# Supplementary material for: Fatty Acid Prediction in Bovine Milk by Attenuated Total Reflection Infrared Spectroscopy after Solvent-Free Lipid Separation
Source: MDPI journal article supplement (doi:10.3390/foods10051054), 2021-05-11
Supplement: s1 [file s1]

## Supplementary material

# Fatty Acid Prediction in Bovine Milk by Attenuated Total Reflection Infrared Spectroscopy after Solvent-free Lipid Separation

Christopher K. Akhgar <sup>1</sup>, Vanessa Nürnberger <sup>2</sup>, Marlene Nadvornik <sup>1</sup>, Margit Velik <sup>3</sup>, Andreas Schwaighofer <sup>1</sup>, Erwin Rosenberg <sup>4</sup> and Bernhard Lendl <sup>1,\*</sup>

<sup>1</sup> FG Environmental Analytics, Process Analytics and Sensors, Institute of Chemical Technologies and Analytics, Technische Universität Wien, Getreidemarkt 9, 1060 Vienna, Austria;  
christopher.akhgar@tuwien.ac.at (C.K.); marlene.nadvornik@student.tuwien.ac.at (M.N.); andreas.schwaighofer@tuwien.ac.at (A.S.)

<sup>2</sup> Competence Center CHASE GmbH, Altenberger Straße 69, 4040 Linz, Austria;  
vanessa.nuernberger@chasecenter.at

<sup>3</sup> HBLFA Raumberg-Gumpenstein, Altdorf 11, 8952 Irdning-Donnersbachtal, Austria;  
margit.velik@raumberg-gumpenstein.at

<sup>4</sup> FG Instrumental and Imaging Analytical Chemistry, Institute of Chemical Technologies and Analytics, Technische Universität Wien, Getreidemarkt 9, 1060 Vienna, Austria;  
egon.rosenberg@tuwien.ac.at

\* Correspondence: bernhard.lendl@tuwien.ac.at; Tel.: +43/1/58801-15140

**Table S1.** Retention time, quantifier and qualifier ions for each analyte of the applied GC/MS method.

| Compound    | Retention Time (min) | Quantifier ion (m/z) | Qualifier ion 1 (m/z) | Qualifier ion 2 (m/z) |
|-------------|----------------------|----------------------|-----------------------|-----------------------|
| C4:0        | 2.795                | 43                   | 74                    | 71                    |
| C6:0        | 5.729                | 74                   | 43                    | 87                    |
| C8:0        | 8.519                | 74                   | 87                    | 43                    |
| C10:0       | 11.3                 | 74                   | 87                    | 43                    |
| C11:0       | 13.185               | 74                   | 87                    | 43                    |
| C12:0       | 15.457               | 74                   | 87                    | 43                    |
| C13:0       | 18.164               | 74                   | 87                    | 43                    |
| C14:0       | 21.2                 | 74                   | 87                    | 43                    |
| C14:1       | 22.833               | 55                   | 41                    | 74                    |
| C15:0       | 24.482               | 74                   | 87                    | 43                    |
| C15:1 cis   | 26.148               | 55                   | 41                    | 74                    |
| C16:0       | 27.902               | 74                   | 87                    | 43                    |
| C16:1 cis   | 29.092               | 55                   | 69                    | 41                    |
| C17:0       | 31.332               | 74                   | 87                    | 43                    |
| C17:1 cis   | 32.485               | 55                   | 69                    | 41                    |
| C18:0       | 34.789               | 74                   | 87                    | 43                    |
| C18:1 trans | 35.332               | 55                   | 69                    | 41                    |
| C18:1 cis   | 35.594               | 55                   | 69                    | 41                    |
| C18:2 trans | 36.922               | 67                   | 81                    | 95                    |
| C18:2 cis   | 37.605               | 67                   | 81                    | 55                    |
| C18:3 n6    | 38.993               | 79                   | 67                    | 80                    |
| C1C18:3 n3  | 40.168               | 79                   | 67                    | 95                    |
| C20:0       | 41.483               | 74                   | 87                    | 43                    |
| C20:1 cis   | 42.124               | 55                   | 69                    | 83                    |
| C20:2 cis   | 43.995               | 67                   | 81                    | 55                    |
| C21:0       | 44.68                | 74                   | 87                    | 43                    |
| C20:3 n6    | 45.192               | 79                   | 67                    | 80                    |
| C20:4 n6    | 46.081               | 79                   | 91                    | 80                    |
| C20:3 n3    | 46.371               | 79                   | 67                    | 95                    |
| C22:0       | 47.851               | 74                   | 87                    | 43                    |
| C22:1 cis   | 48.38                | 55                   | 69                    | 83                    |
| C20:5 (EPA) | 48.63                | 79                   | 91                    | 67                    |
| C22:2       | 50.079               | 67                   | 81                    | 55                    |
| C23:0       | 50.86                | 74                   | 87                    | 43                    |
| C24:0       | 53.873               | 74                   | 87                    | 43                    |
| C24:1 cis   | 54.312               | 55                   | 69                    | 83                    |
| C22:6 (DHA) | 55.417               | 79                   | 91                    | 67                    |

**Table S2.** Statistical parameters for each individual calibration equation, using set of 30 samples as employed for external validation.

| Fatty acid | LVs | g/100g fat  |       |                |
|------------|-----|-------------|-------|----------------|
|            |     | Range       | RMSEC | R <sup>2</sup> |
| SAT        | 8   | 61.6 - 74.5 | 0.19  | 0.99           |
| MONO       | 8   | 19.8 - 30.3 | 0.16  | 1.0            |
| PUFA       | 3   | 2.2 - 4.2   | 0.17  | 0.81           |
| UNSAT      | 8   | 22.1 - 33.8 | 0.17  | 1.0            |
| SCFA       | 7   | 14.2 - 21.0 | 0.30  | 0.94           |
| MCFA       | 7   | 38.1 - 56.0 | 0.44  | 0.99           |
| LCFA       | 7   | 26.4 - 47.7 | 0.32  | 0.99           |
| C4:0       | 6   | 5.4 - 8.8   | 0.19  | 0.93           |
| C6:0       | 5   | 3.1 - 5.4   | 0.2   | 0.72           |
| C8:0       | 5   | 1.5 - 3.2   | 0.11  | 0.79           |
| C10:0      | 7   | 2.1 - 4.9   | 0.04  | 1.0            |
| C12:0      | 5   | 2.0 - 5.6   | 0.08  | 0.98           |
| C14:0      | 7   | 7.4 - 13.3  | 0.15  | 0.98           |
| C16:0      | 8   | 21.1 - 35.1 | 0.22  | 0.99           |
| C16:1cis   | 4   | 1.2 - 3.9   | 0.3   | 0.74           |
| C18:0      | 5   | 5.6 - 14.6  | 0.36  | 0.97           |
| C18:1cis   | 8   | 14.9 - 27.2 | 0.15  | 1.0            |

Abbreviations: LVs: latent variables; RMSEC: root mean square error of calibration; R<sup>2</sup>: calibration coefficient of determination. SAT: saturated fatty acids; MONO: monounsaturated fatty acids; PUFA: polyunsaturated fatty acids; UNSAT: unsaturated fatty acids; SCFA: short-chain fatty acids (C4-C10); MCFA: medium-chain fatty acids (C12-C16); LCFA: long-chain fatty acids (C17 and higher).
